# Supplementary material for: TBX3 and EFNA4 Variant in a Family with Ulnar-Mammary Syndrome and Sagittal Craniosynostosis
Source: MDPI journal article supplement (doi:10.3390/genes13091649), 2022-09-14
Supplement: s1 [file s1]

|               | Where?    | Score | Interpretation - up vs downstream interpretations flipped from the spliceai notes to account for the antisense coding strand.                                                                                                           |
|---------------|-----------|-------|-----------------------------------------------------------------------------------------------------------------------------------------------------------------------------------------------------------------------------------------|
| Acceptor Loss | +147 bp   | 0.63  | Hi confidence that the splice site 147 bp in the 5' direction will no longer function as an acceptor (63% increase in the chance that the position of coordinates plus 147 is no longer functioning as an acceptor [12:115,117,456])    |
| Donor Loss    | +1 bp     | 0.99  | Hi confidence (Near certainty) that the splice site 1 bp in the 5' direction of the variant site will no longer function as a donor. (99% chance of loss of function as a donor site at variant coordinates plus 1 bp [12:115,117,310]) |
| Acceptor Gain | (-)55 bp  | 0.02  | There is no predicted likely acceptor site gained in a 500 bp window around the variant.                                                                                                                                                |
| Donor Gain    | (-)186 bp | 0.32  | Medium confidence that a site 186 bp in the 3' direction of the variant will now become the preferred donor site for the splice [12:115,117,123].                                                                                       |
