# Supplementary material for: TBX3 and EFNA4 Variant in a Family with Ulnar-Mammary Syndrome and Sagittal Craniosynostosis
Source: MDPI journal article supplement (doi:10.3390/genes13091649), 2022-09-14
Supplement: s1 [file s1]

Table S1: 31 genes which were targeted for next generation sequencing in the proband.

| Gene           | OMIM ID |
|----------------|---------|
| <i>ALPL</i>    | 171760  |
| <i>ALX4</i>    | 605420  |
| <i>ASXL1</i>   | 612990  |
| <i>CDC45</i>   | 603465  |
| <i>CYP26B1</i> | 605207  |
| <i>EFNB1</i>   | 300035  |
| <i>ERF</i>     | 611888  |
| <i>FGFR1</i>   | 136350  |
| <i>FGFR2</i>   | 176943  |
| <i>FGFR3</i>   | 134934  |
| <i>GLI3</i>    | 165240  |
| <i>IFT122</i>  | 606045  |
| <i>IFT43</i>   | 614068  |
| <i>IL11RA</i>  | 600939  |
| <i>MASP1</i>   | 600521  |
| <i>MEGF8</i>   | 604267  |
| <i>MSX2</i>    | 123101  |
| <i>P4HB</i>    | 176790  |
| <i>POR</i>     | 124015  |
| <i>RAB23</i>   | 606144  |
| <i>RECQL4</i>  | 603780  |
| <i>SEC24D</i>  | 607186  |
| <i>SKI</i>     | 164780  |
| <i>TBX3</i>    | 601621  |
| <i>TCF12</i>   | 600480  |
| <i>TGFB1</i>   | 190181  |
| <i>TGFB2</i>   | 190182  |
| <i>TMCO1</i>   | 213980  |
| <i>TWIST1</i>  | 601622  |
| <i>WDR35</i>   | 613602  |
| <i>ZIC1</i>    | 600470  |
