# Supplementary material for: TBX3 and EFNA4 Variant in a Family with Ulnar-Mammary Syndrome and Sagittal Craniosynostosis
Source: MDPI journal article supplement (doi:10.3390/genes13091649), 2022-09-14
Supplement: s1 [file s1]

| <b>Gene</b>    | <b>OMIM ID</b> |
|----------------|----------------|
| <i>ALPL</i>    | 171760         |
| <i>ALX4</i>    | 605420         |
| <i>ASXL1</i>   | 612990         |
| <i>B3GAT3</i>  | 606374         |
| <i>CD96</i>    | 606037         |
| <i>CDC45</i>   | 603465         |
| <i>CDT1</i>    | 605525         |
| <i>COLEC11</i> | 612502         |
| <i>CYP26B1</i> | 605207         |
| <i>EFNA4</i>   | 601380         |
| <i>EFNB1</i>   | 300035         |
| <i>ERF</i>     | 611888         |
| <i>ESCO2</i>   | 609353         |
| <i>FBN1</i>    | 134797         |
| <i>FGF9</i>    | 600921         |
| <i>FGFR1</i>   | 136350         |
| <i>FGFR2</i>   | 176943         |
| <i>FGFR3</i>   | 134934         |
| <i>FREM1</i>   | 608944         |
| <i>GLI3</i>    | 165240         |
| <i>GPC3</i>    | 300037         |
| <i>IFT122</i>  | 606045         |
| <i>IFT140</i>  | 614620         |
| <i>IFT43</i>   | 614068         |
| <i>IGF1R</i>   | 147370         |
| <i>IL11RA</i>  | 600939         |
| <i>KAT6A</i>   | 601408         |
| <i>KAT6B</i>   | 605880         |
| <i>MASP1</i>   | 600521         |
| <i>MEGF8</i>   | 604267         |
| <i>MSX2</i>    | 123101         |
| <i>NFIA</i>    | 600727         |
| <i>ORC1</i>    | 601902         |
| <i>ORC4</i>    | 603056         |
| <i>ORC6</i>    | 607213         |
| <i>P4HB</i>    | 176790         |
| <i>PHEX</i>    | 300550         |
| <i>POR</i>     | 124015         |
| <i>PPP3CA</i>  | 114105         |
| <i>RAB23</i>   | 606144         |
| <i>RECQL4</i>  | 603780         |
| <i>RSPRY1</i>  | 616585         |
| <i>RUNX2</i>   | 600211         |
| <i>SCARF2</i>  | 613619         |
| <i>SEC24D</i>  | 607186         |
| <i>SIX2</i>    | 604994         |
| <i>SKI</i>     | 164780         |

| <b>Gene</b>     | <b>OMIM ID</b> |
|-----------------|----------------|
| <i>SLC25A24</i> | 608744         |
| <i>SMAD2</i>    | 601366         |
| <i>SMAD3</i>    | 603109         |
| <i>SMAD6</i>    | 602931         |
| <i>SOX6</i>     | 607257         |
| <i>SPECC1L</i>  | 614140         |
| <i>STAT3</i>    | 102582         |
| <i>TCF12</i>    | 600480         |
| <i>TCOF1</i>    | 606847         |
| <i>TGFB2</i>    | 190220         |
| <i>TGFB3</i>    | 190230         |
| <i>TGFBR1</i>   | 190181         |
| <i>TGFBR2</i>   | 190182         |
| <i>TMCO1</i>    | 213980         |
| <i>TWIST1</i>   | 601622         |
| <i>WDR19</i>    | 608151         |
| <i>WDR35</i>    | 613602         |
| <i>ZEB2</i>     | 605802         |
| <i>ZIC1</i>     | 600470         |
