# Supplementary material for: TBX3 and EFNA4 Variant in a Family with Ulnar-Mammary Syndrome and Sagittal Craniosynostosis
Source: Genes (Basel). 2022 Sep 14;13(9):1649. doi: 10.3390/genes13091649 (PMC9498434; doi:10.3390/genes13091649)
Supplement: Supplementary file 1 [file genes-13-01649-s001.zip]

Archive with 6 entries (6 files):
- Supplementary Figure S1_Chromatogram.pdf
- Supplementary Figure S2_EFNA4 c.178C_T reported craniosynostosis (2).jpg
- Supplementary Table S1.pdf
- Supplementary Table S2_SpliceAI Prediction table.pdf
- Supplementary Table S3_WGS_craniosynostosis gene list.pdf
- Supplementary Table S4_list of VUS on WGS for craniosynostosis.xlsx
