# Supplementary figures and images for: TBX3 and EFNA4 Variant in a Family with Ulnar-Mammary Syndrome and Sagittal Craniosynostosis
Source: MDPI journal article supplement (doi:10.3390/genes13091649), 2022-09-14

Wild-type

*TBX3*

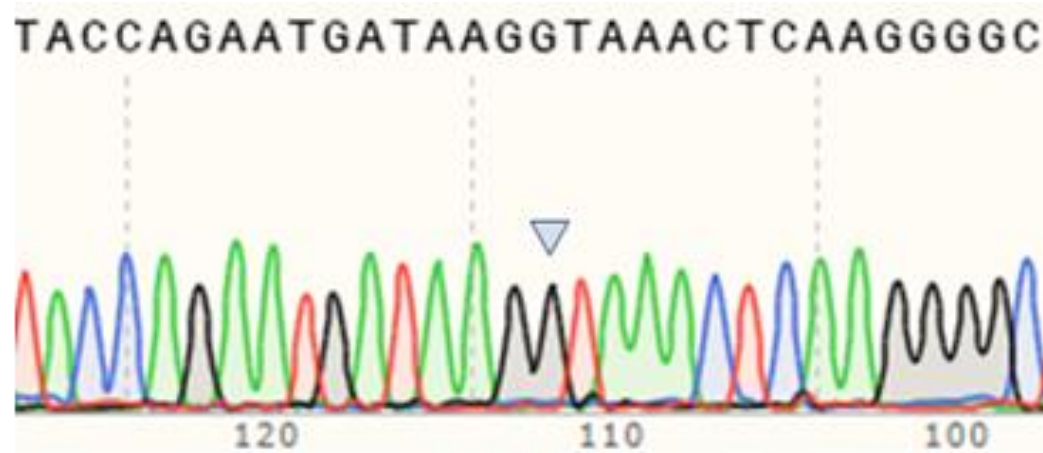

*TBX3* c.804+1 G>A variant

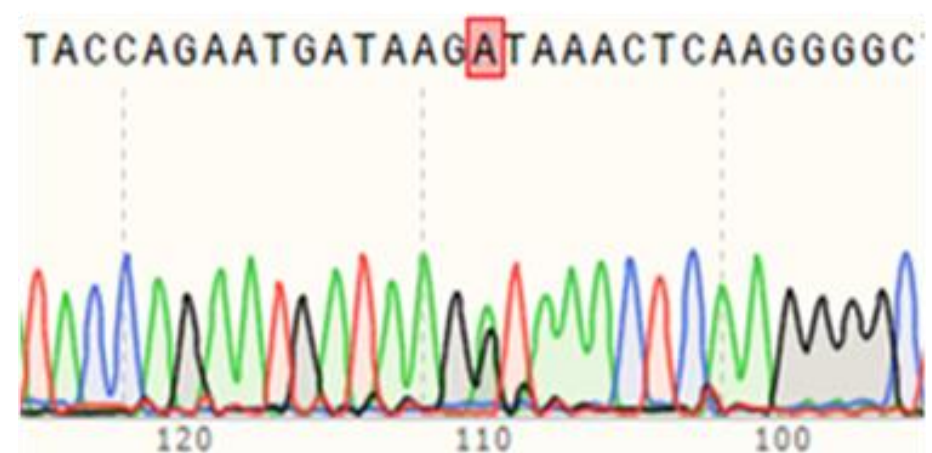

Wild-type

*EFNA4*

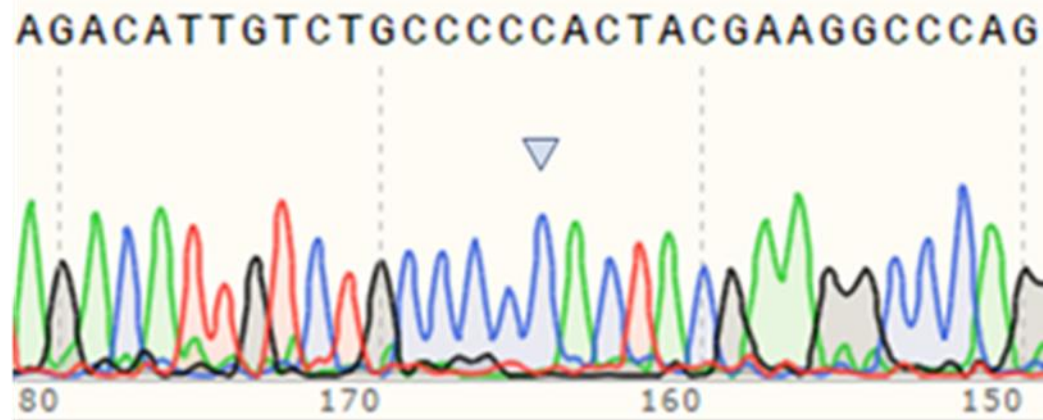

*EFNA4* c.178 C>T variant

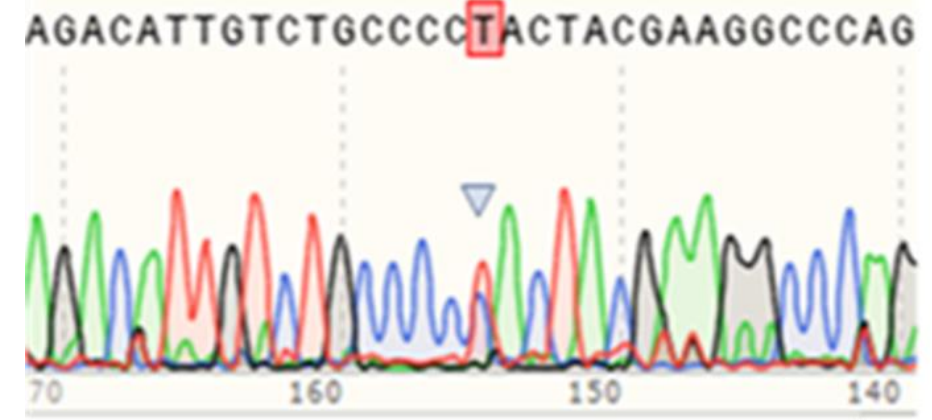

Supplement: s1 [file s1]
